# Supplementary material for: Medical gloves modified by a one-minute spraying process with blood-repellent, antibacterial and wound-healing abilities
Source: Royal Society of Chemistry journal article supplement (doi:10.1039/d1bm01212f), 2022-01-01
Supplement: d1bm01212f2.pdf [file d1bm01212f2.pdf]

Electronic Supplementary Material (ESI) for Biomaterials Science.  
This journal is © The Royal Society of Chemistry 2021

### Electronic Supplementary Information

#### Medical Gloves Modified by A One-Minute Spraying Process with Blood-Repellent, Antibacterial and Wound-Healing Abilities

Yi Zhuo<sup>a†</sup>, Xinyan Cheng<sup>b</sup>, Hua Fang<sup>a</sup>, Yi Zhang<sup>a</sup>, Bing Wang<sup>a</sup>, Shuang Jia<sup>c</sup>, Weihao Li<sup>c</sup>, Xuetao Yang<sup>c</sup>, Yan Zhang<sup>a\*</sup>, Xiaolei Wang<sup>c,d\*</sup>

<sup>a</sup> The Second Affiliated Hospital, Nanchang University, Nanchang, Jiangxi 330088, China.

<sup>b</sup> School of Materials Science and Engineering, Nanchang University, Nanchang, Jiangxi 330088, China.

<sup>c</sup> The National Engineering Research Center for Bioengineering Drugs and the Technologies, Institute of Translational Medicine, Nanchang University, Nanchang, Jiangxi 330088, China.

<sup>d</sup> College of Chemistry, Nanchang University, Nanchang, Jiangxi 330088, China.

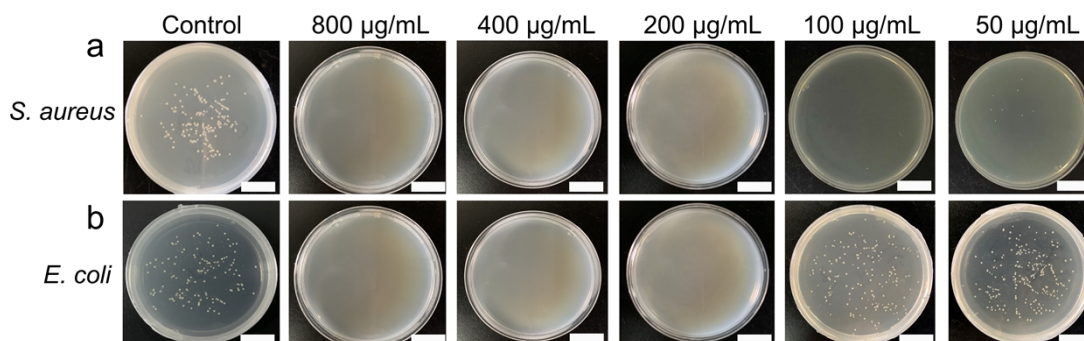

**Fig. S1** Agar plates photos of a) *S. aureus* and b) *E. coli* as referred to Fig. 3a and 3b. (scale bar = 2 cm).

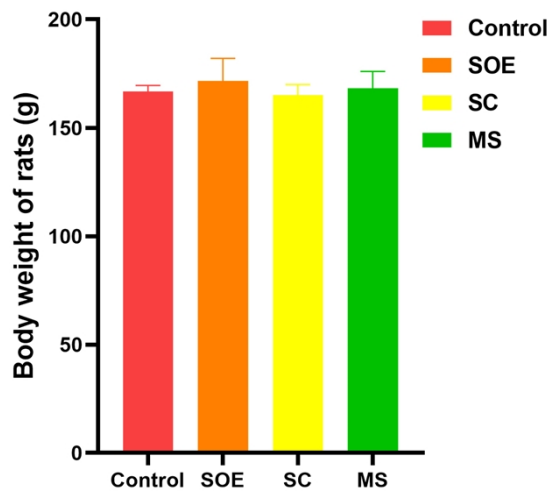

**Fig. S2** Body weight of rats in each group before experiments *in vivo*. Data are means  $\pm$  SD. (n = 3).

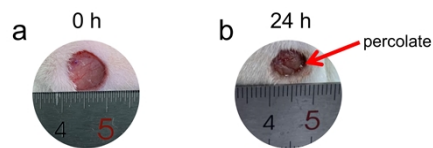

**Fig. S3** Photographs of wounds in rats after bacteria inoculation for a) 0 h and b) 24 h.

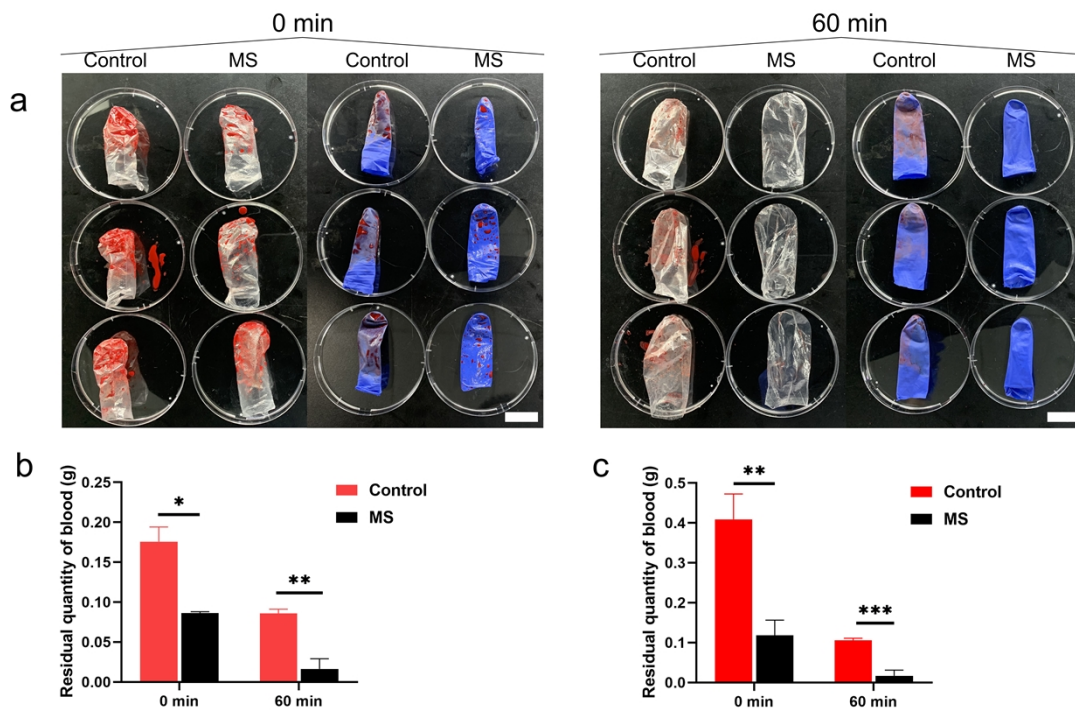

**Fig. S4** Blood repellent effect of blood-repellent polyethylene film gloves and nitrile gloves *in vivo*. a) The blood repellent effect of polyethylene film gloves and nitrile gloves on new blood after sprayed with MS or not (0 min, 60 min) (scale bar = 3 cm); b) The corresponding quantitative measurement of blood repellent effect of ordinary polyethylene film gloves (Control) and blood sparing polyethylene film gloves sprayed with MS *in vivo*; c) The corresponding quantitative measurement of blood repellent efficiency of ordinary nitrile gloves (Control) and blood sparing nitrile gloves sprayed with MS *in vivo*. Data are means  $\pm$  SD. (n = 3). \*  $p < 0.05$ , \*\*  $p < 0.01$ , \*\*\*  $p < 0.001$ .

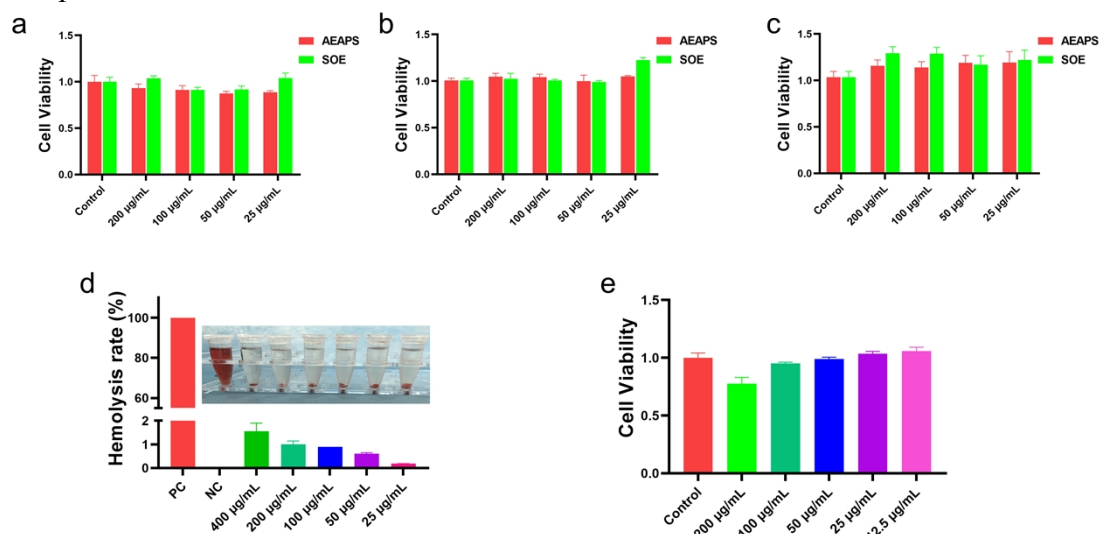

**Fig. S5** Cytotoxicity of AEAPS and SOE on HUVECs in a) 6 h, b) 24 h, and c) 72h; d) Hemolysis rate of RBCs co-cultured with MS; e) Cytotoxicity of HUVECs treated with MS of different concentrations for 24 h. Data are means

$\pm$  SD. (n = 3).

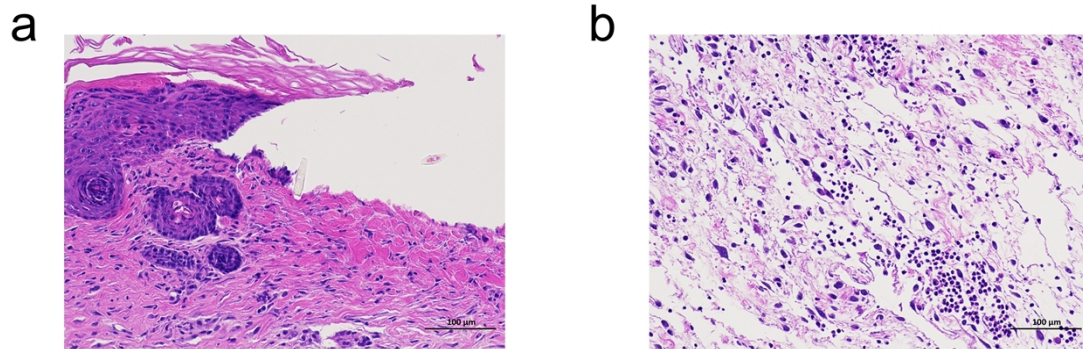

**Fig. S6** H&E stained pictures of uninfected wounds after MS treatment for a) 24 h and b) 48 h.
